# Supplementary material
Source: publisher site journal article supplement (https://www.dovepress.com/article/305167)
Supplement: Supplementary file 1 [file get_supplementary_file.php]

### Phenotype-Genotype Matrix

1 = present; 0 = absent; **Biofilm strength:** S or 3= Strong; M or 2 = Moderate; W or 1 = Weak

| Isolate | Gelatinase | Caseinase | Hemolysis | gelE | sprE | cyI | agg | pil | ace | fsrB | fsrC | fsrA | fsrA_&_B | fsrA_or_B | Biofilm Assay OD<br>(Median-based) | Biofilm Strength | Biofilm Index | Mean OD | Strength on Mean | Index on Mean | OD SD  |
|---------|------------|-----------|-----------|------|------|-----|-----|-----|-----|------|------|------|----------|-----------|------------------------------------|------------------|---------------|---------|------------------|---------------|--------|
| EU02    | 0          | 0         | 1         | 1    | 1    | 1   | 1   | 1   | 1   | 1    | 1    | 1    | 1        | 1         | 0.649                              | S                | 3             | 0.65    | S                | 3             | 0.0105 |
| EU05    | 1          | 1         | 1         | 1    | 1    | 1   | 1   | 1   | 1   | 1    | 1    | 1    | 1        | 1         | 0.105                              | W                | 1             | 0.11    | W                | 1             | 0.0056 |
| EU07    | 0          | 0         | 1         | 1    | 1    | 1   | 1   | 1   | 1   | 0    | 1    | 0    | 0        | 0         | 0.73                               | S                | 3             | 0.71    | S                | 3             | 0.0468 |
| EU08    | 0          | 0         | 1         | 1    | 1    | 1   | 1   | 1   | 1   | 0    | 0    | 0    | 0        | 0         | 0.825                              | S                | 3             | 0.89    | S                | 3             | 0.1882 |
| EU09    | 0          | 0         | 0         | 1    | 1    | 0   | 1   | 1   | 1   | 0    | 1    | 0    | 0        | 0         | 1.52                               | S                | 3             | 1.54    | S                | 3             | 0.0493 |
| EU10    | 0          | 0         | 1         | 1    | 1    | 1   | 1   | 1   | 1   | 0    | 1    | 1    | 0        | 1         | 0.657                              | S                | 3             | 0.66    | S                | 3             | 0.0955 |
| EU11    | 0          | 1         | 1         | 1    | 1    | 1   | 1   | 1   | 1   | 0    | 1    | 0    | 0        | 0         | 1.17                               | S                | 3             | 1.17    | S                | 3             | 0.0540 |
| EU12    | 0          | 0         | 0         | 1    | 1    | 0   | 1   | 1   | 1   | 1    | 0    | 0    | 0        | 1         | 0.3                                | S                | 3             | 0.32    | S                | 3             | 0.0657 |
| EU13    | 0          | 1         | 0         | 1    | 1    | 0   | 1   | 1   | 1   | 0    | 0    | 0    | 0        | 0         | 0.167                              | M                | 2             | 0.19    | M                | 2             | 0.0692 |
| EU14    | 0          | 1         | 0         | 1    | 1    | 0   | 0   | 1   | 1   | 0    | 1    | 0    | 0        | 0         | 1.985                              | S                | 3             | 2.28    | S                | 3             | 0.6259 |
| EU15    | 0          | 1         | 1         | 1    | 1    | 1   | 1   | 1   | 1   | 0    | 1    | 0    | 0        | 0         | 1.088                              | S                | 3             | 1.07    | S                | 3             | 0.0782 |
| EU16    | 0          | 1         | 1         | 1    | 1    | 1   | 0   | 1   | 1   | 0    | 0    | 0    | 0        | 0         | 0.163                              | M                | 2             | 0.18    | M                | 2             | 0.0289 |
| EU17    | 1          | 1         | 0         | 1    | 1    | 0   | 1   | 1   | 1   | 1    | 1    | 1    | 1        | 1         | 0.111                              | W                | 1             | 0.11    | W                | 1             | 0.0144 |
| EU18    | 0          | 1         | 1         | 1    | 1    | 1   | 1   | 1   | 1   | 0    | 0    | 0    | 0        | 0         | 0.145                              | M                | 2             | 0.16    | M                | 2             | 0.0289 |
| EU20    | 1          | 1         | 0         | 1    | 1    | 0   | 0   | 1   | 1   | 1    | 1    | 1    | 1        | 1         | 0.667                              | S                | 3             | 0.64    | S                | 3             | 0.1116 |
| EU21    | 0          | 1         | 1         | 1    | 1    | 1   | 1   | 1   | 1   | 0    | 0    | 0    | 0        | 0         | 0.15                               | M                | 2             | 0.14    | M                | 2             | 0.0212 |
| EU27    | 0          | 1         | 0         | 1    | 1    | 0   | 1   | 1   | 1   | 0    | 0    | 0    | 0        | 0         | 0.828                              | S                | 3             | 0.83    | S                | 3             | 0.0221 |
| EU29    | 0          | 0         | 1         | 1    | 1    | 1   | 1   | 1   | 1   | 0    | 1    | 1    | 0        | 1         | 0.133                              | M                | 2             | 0.14    | M                | 2             | 0.0129 |
| EU31    | 0          | 0         | 1         | 1    | 1    | 1   | 1   | 1   | 1   | 0    | 1    | 0    | 0        | 0         | 0.597                              | S                | 3             | 0.57    | S                | 3             | 0.1515 |
| EU32    | 0          | 1         | 0         | 1    | 1    | 0   | 1   | 1   | 1   | 0    | 1    | 0    | 0        | 0         | 0.4                                | S                | 3             | 0.39    | S                | 3             | 0.0506 |
| EU33    | 0          | 1         | 0         | 1    | 1    | 0   | 0   | 1   | 1   | 0    | 0    | 0    | 0        | 0         | 0.22                               | M                | 2             | 0.22    | M                | 2             | 0.0252 |
| EU34    | 0          | 0         | 1         | 1    | 1    | 1   | 0   | 1   | 1   | 0    | 0    | 0    | 0        | 0         | 0.653                              | S                | 3             | 0.68    | S                | 3             | 0.0520 |
| EU35    | 0          | 0         | 0         | 0    | 0    | 0   | 0   | 1   | 1   | 0    | 0    | 0    | 0        | 0         | 0.084                              | W                | 1             | 0.09    | W                | 1             | 0.0061 |
| EU36    | 0          | 1         | 0         | 0    | 0    | 0   | 0   | 1   | 1   | 0    | 1    | 0    | 0        | 0         | 0.089                              | W                | 1             | 0.09    | W                | 1             | 0.0072 |
| EU37    | 0          | 1         | 0         | 1    | 1    | 0   | 1   | 1   | 1   | 0    | 0    | 0    | 0        | 0         | 0.28                               | S                | 3             | 0.28    | S                | 3             | 0.0300 |
| EU38    | 0          | 1         | 1         | 1    | 1    | 1   | 1   | 1   | 1   | 0    | 1    | 1    | 0        | 1         | 1.071                              | S                | 3             | 1.28    | S                | 3             | 0.4426 |
| EU39    | 0          | 1         | 0         | 1    | 1    | 1   | 1   | 1   | 1   | 0    | 0    | 1    | 0        | 1         | 0.628                              | S                | 3             | 0.62    | S                | 3             | 0.0316 |
| EU41    | 0          | 0         | 0         | 0    | 0    | 0   | 0   | 1   | 1   | 0    | 0    | 0    | 0        | 0         | 0.096                              | W                | 1             | 0.09    | W                | 1             | 0.0106 |

|      |   |   |   |   |   |   |   |   |   |   |   |   |   |   |       |   |   |      |   |   |        |
|------|---|---|---|---|---|---|---|---|---|---|---|---|---|---|-------|---|---|------|---|---|--------|
| EU42 | 0 | 1 | 0 | 1 | 1 | 0 | 0 | 1 | 1 | 0 | 0 | 1 | 0 | 1 |       |   |   | 0.31 | S | 3 | 0.2154 |
| EU43 | 0 | 1 | 1 | 1 | 1 | 1 | 0 | 1 | 1 | 0 | 1 | 1 | 0 | 1 | 1.793 | S | 3 | 1.62 | S | 3 | 0.3909 |
| EU44 | 1 | 1 | 0 | 1 | 1 | 1 | 1 | 1 | 1 | 1 | 1 | 1 | 1 | 1 | 1.487 | S | 3 | 1.4  | S | 3 | 0.4113 |
| EU45 | 1 | 1 | 0 | 1 | 1 | 1 | 0 | 1 | 1 | 1 | 1 | 0 | 0 | 1 | 0.163 | M | 2 | 0.17 | M | 2 | 0.0146 |
| EU46 | 0 | 0 | 0 | 1 | 1 | 0 | 0 | 1 | 1 | 0 | 0 | 0 | 0 | 0 | 1.572 | S | 3 | 1.47 | S | 3 | 0.3346 |
| EU47 | 0 | 0 | 0 | 1 | 1 | 1 | 0 | 1 | 1 | 0 | 1 | 0 | 0 | 0 | 0.172 | M | 2 | 0.16 | M | 2 | 0.0287 |
| EU48 | 1 | 1 | 0 | 1 | 1 | 0 | 1 | 1 | 1 | 1 | 1 | 1 | 1 | 1 | 0.26  | M | 2 | 0.26 | M | 2 | 0.0148 |
| EU50 | 0 | 1 | 0 | 1 | 1 | 1 | 1 | 1 | 1 | 0 | 0 | 1 | 0 | 1 | 0.397 | S | 3 | 0.4  | S | 3 | 0.0335 |
| EU51 | 0 | 0 | 0 | 1 | 1 | 1 | 1 | 1 | 1 | 0 | 0 | 1 | 0 | 1 | 0.64  | S | 3 | 0.66 | S | 3 | 0.0690 |
| EU52 | 0 | 0 | 0 | 1 | 1 | 0 | 1 | 1 | 1 | 0 | 0 | 0 | 0 | 0 | 0.169 | M | 2 | 0.17 | M | 2 | 0.0157 |
| EU53 | 0 | 0 | 0 | 0 | 0 | 1 | 0 | 1 | 1 | 0 | 0 | 0 | 0 | 0 | 0.161 | M | 2 | 0.16 | M | 2 | 0.0046 |
| EU54 | 0 | 1 | 0 | 1 | 1 | 0 | 0 | 1 | 1 | 0 | 0 | 0 | 0 | 0 | 0.901 | S | 3 | 0.83 | S | 3 | 0.1439 |
| EU55 | 0 | 1 | 0 | 1 | 1 | 0 | 0 | 1 | 1 | 0 | 0 | 0 | 0 | 0 | 0.654 | S | 3 | 0.75 | S | 3 | 0.2103 |
| EU56 | 0 | 0 | 0 | 1 | 1 | 0 | 1 | 1 | 1 | 1 | 1 | 1 | 1 | 1 | 0.895 | S | 3 | 0.92 | S | 3 | 0.1103 |
| EU57 | 0 | 0 | 0 | 1 | 1 | 0 | 1 | 1 | 1 | 0 | 0 | 0 | 0 | 0 | 0.776 | S | 3 | 0.76 | S | 3 | 0.0444 |
| EU58 | 0 | 0 | 0 | 0 | 0 | 0 | 1 | 1 | 1 | 0 | 0 | 0 | 0 | 0 | 0.672 | S | 3 | 0.66 | S | 3 | 0.0474 |
| EU59 | 0 | 0 | 1 | 0 | 0 | 1 | 1 | 1 | 1 | 0 | 0 | 0 | 0 | 0 | 0.74  | S | 3 | 0.74 | S | 3 | 0.0144 |
| EU60 | 1 | 0 | 1 | 1 | 1 | 1 | 1 | 1 | 1 | 1 | 1 | 1 | 1 | 1 | 0.315 | S | 3 | 0.3  | S | 3 | 0.0303 |
| EU61 | 1 | 0 | 1 | 1 | 1 | 1 | 1 | 1 | 1 | 1 | 1 | 1 | 1 | 1 | 0.328 | S | 3 | 0.31 | S | 3 | 0.0318 |
| EU62 | 0 | 0 | 1 | 1 | 1 | 1 | 1 | 1 | 1 | 1 | 1 | 1 | 1 | 1 | 0.426 | S | 3 | 0.44 | S | 3 | 0.0444 |
| EU64 | 0 | 0 | 0 | 1 | 1 | 0 | 0 | 1 | 1 | 0 | 0 | 1 | 0 | 1 | 0.552 | S | 3 | 0.54 | S | 3 | 0.0808 |
| EU65 | 0 | 0 | 0 | 0 | 0 | 0 | 1 | 1 | 1 | 0 | 0 | 0 | 0 | 0 | 0.798 | S | 3 | 0.84 | S | 3 | 0.1069 |
| EU66 | 0 | 1 | 0 | 1 | 1 | 0 | 1 | 1 | 1 | 0 | 1 | 1 | 0 | 1 | 1.003 | S | 3 | 1.04 | S | 3 | 0.1223 |
| EU67 | 1 | 1 | 0 | 1 | 1 | 0 | 1 | 1 | 1 | 1 | 1 | 1 | 1 | 1 | 0.11  | W | 1 | 0.11 | W | 1 | 0.0023 |
| EU68 | 1 | 1 | 0 | 1 | 1 | 0 | 0 | 1 | 1 | 0 | 0 | 1 | 0 | 1 | 0.314 | S | 3 | 0.32 | S | 3 | 0.0155 |
| EU69 | 1 | 1 | 0 | 1 | 1 | 0 | 0 | 1 | 1 | 1 | 1 | 1 | 1 | 1 | 0.103 | W | 1 | 0.11 | W | 1 | 0.0044 |
| EU70 | 0 | 1 | 0 | 1 | 1 | 0 | 0 | 1 | 1 | 0 | 0 | 0 | 0 | 0 | 0.908 | S | 3 | 0.97 | S | 3 | 0.1290 |
| EU71 | 0 | 0 | 0 | 0 | 0 | 0 | 1 | 1 | 1 | 0 | 0 | 0 | 0 | 0 | 0.104 | W | 1 | 0.1  | W | 1 | 0.0086 |
| EU72 | 0 | 1 | 0 | 1 | 1 | 0 | 1 | 1 | 1 | 1 | 0 | 0 | 0 | 1 | 0.717 | S | 3 | 0.7  | S | 3 | 0.0509 |
| EU73 | 0 | 1 | 1 | 1 | 1 | 1 | 1 | 1 | 1 | 0 | 0 | 0 | 0 | 0 | 0.251 | M | 2 | 0.25 | M | 2 | 0.0270 |
| EU74 | 1 | 1 | 0 | 1 | 1 | 0 | 1 | 1 | 1 | 1 | 1 | 1 | 1 | 1 | 0.197 | M | 2 | 0.2  | M | 2 | 0.0180 |
| EU75 | 1 | 1 | 0 | 1 | 1 | 0 | 1 | 1 | 1 | 1 | 1 | 1 | 1 | 1 | 0.18  | M | 2 | 0.18 | M | 2 | 0.0147 |

Counts

|   |    |    |    |    |    |    |    |    |    |    |    |    |
|---|----|----|----|----|----|----|----|----|----|----|----|----|
| + | 13 | 34 | 20 | 52 | 52 | 27 | 40 | 60 | 60 | 17 | 29 | 25 |
| - | 47 | 26 | 40 | 8  | 8  | 33 | 20 | 0  | 0  | 43 | 31 | 35 |

### # Chi-squared statistical test with Yates correction

|                         | Gelatinase | Caseinase | Hemolysis | gelE   | sprE   | cyl    | agg    | pil     | ace     | fsrB    | fsrC    | fsrA    | fsrA & B | fsrA or B | Biofilm Strength |
|-------------------------|------------|-----------|-----------|--------|--------|--------|--------|---------|---------|---------|---------|---------|----------|-----------|------------------|
| <b>Gelatinase</b>       | NA         | 0.0475    | 0.5796    | 0.2556 | 0.2556 | 0.8255 | 1      | Invalid | Invalid | 5E-08   | 0.0011  | 0.0001  | 3E-08    | 5E-05     | 0.0622           |
| <b>Caseinase</b>        | NA         | NA        | 0.311     | 0.0201 | 0.0201 | 0.3459 | 0.5191 | Invalid | Invalid | 0.6163  | 0.5781  | 0.4811  | 0.7271   | 0.3937    | 0.3166           |
| <b>Hemolysis</b>        | NA         | NA        | NA        | 0.3473 | 0.3473 | 7E-09  | 0.0658 | Invalid | Invalid | 0.9193  | 0.1205  | 0.9262  | 1        | 1         | 0.3845           |
| <b>gelE</b>             | NA         | NA        | NA        | NA     | 7E-13  | 0.4011 | 0.502  | Invalid | Invalid | 0.1365  | 0.0721  | 0.0291  | 0.2198   | 0.0138    | 0.0053           |
| <b>sprE</b>             | NA         | NA        | NA        | NA     | NA     | 0.4011 | 0.502  | Invalid | Invalid | 0.1365  | 0.0721  | 0.0291  | 0.2198   | 0.0138    | 0.0053           |
| <b>cyl</b>              | NA         | NA        | NA        | NA     | NA     | NA     | 0.1688 | Invalid | Invalid | 0.9312  | 0.2033  | 0.5106  | 1        | 0.6397    | 0.1097           |
| <b>agg</b>              | NA         | NA        | NA        | NA     | NA     | NA     | NA     | Invalid | Invalid | 0.1879  | 0.2351  | 0.3085  | 0.1606   | 0.3142    | 0.4288           |
| <b>pil</b>              | NA         | NA        | NA        | NA     | NA     | NA     | NA     | NA      | Invalid | Invalid | Invalid | Invalid | Invalid  | Invalid   | invalid          |
| <b>ace</b>              | NA         | NA        | NA        | NA     | NA     | NA     | NA     | NA      | NA      | Invalid | Invalid | Invalid | Invalid  | Invalid   | invalid          |
| <b>fsrB</b>             | NA         | NA        | NA        | NA     | NA     | NA     | NA     | NA      | NA      | NA      | 0.0003  | 0.0002  | 1E-10    | 9E-07     | 0.3474           |
| <b>fsrC</b>             | NA         | NA        | NA        | NA     | NA     | NA     | NA     | NA      | NA      | NA      | NA      | 0.0008  | 4E-05    | 0.002     | 0.6717           |
| <b>fsrA</b>             | NA         | NA        | NA        | NA     | NA     | NA     | NA     | NA      | NA      | NA      | NA      | NA      | 2E-06    | 2E-11     | 0.5381           |
| <b>fsrA &amp; B</b>     | NA         | NA        | NA        | NA     | NA     | NA     | NA     | NA      | NA      | NA      | NA      | NA      | NA       | 2E-05     | 0.1682           |
| <b>fsrA or B</b>        | NA         | NA        | NA        | NA     | NA     | NA     | NA     | NA      | NA      | NA      | NA      | NA      | NA       | NA        | 0.6868           |
| <b>Biofilm Strength</b> | NA         | NA        | NA        | NA     | NA     | NA     | NA     | NA      | NA      | NA      | NA      | NA      | NA       | NA        | NA               |

Key: p-value <0.005 <0.01 <0.05

# Fisher's Exact Test for count data, with *p*-values computed by Monte Carlo simulations for tables larger than 2x2

|                         | Gelatinase | Caseinase | Hemolysis | gelE   | sprE   | cyl    | agg    | pil     | ace     | fsrB    | fsrC    | fsrA    | fsrA & B | fsrA or B | Biofilm Strength |
|-------------------------|------------|-----------|-----------|--------|--------|--------|--------|---------|---------|---------|---------|---------|----------|-----------|------------------|
| <b>Gelatinase</b>       | NA         | 0.028     | 0.5128    | 0.1817 | 0.1817 | 0.7553 | 1      | invalid | invalid | 5E-08   | 0.0004  | 4E-05   | 7E-08    | 7E-06     | 0.0525           |
| <b>Caseinase</b>        | NA         | NA        | 0.2706    | 0.0164 | 0.0164 | 0.2975 | 0.4162 | invalid | invalid | 0.5656  | 0.4462  | 0.4303  | 0.555    | 0.3052    | 0.3233           |
| <b>Hemolysis</b>        | NA         | NA        | NA        | 0.2487 | 0.2487 | 2E-10  | 0.0436 | invalid | invalid | 0.7686  | 0.1004  | 0.7847  | 1        | 1         | 0.4798           |
| <b>gelE</b>             | NA         | NA        | NA        | NA     | 4E-10  | 0.2759 | 0.4218 | invalid | invalid | 0.0912  | 0.0535  | 0.0162  | 0.179    | 0.0053    | 0.013            |
| <b>sprE</b>             | NA         | NA        | NA        | NA     | NA     | 0.2759 | 0.4218 | invalid | invalid | 0.0912  | 0.0535  | 0.0162  | 0.179    | 0.0053    | 0.011            |
| <b>cyl</b>              | NA         | NA        | NA        | NA     | NA     | NA     | 0.168  | invalid | invalid | 0.7789  | 0.194   | 0.4339  | 1        | 0.6039    | 0.1314           |
| <b>agg</b>              | NA         | NA        | NA        | NA     | NA     | NA     | NA     | invalid | invalid | 0.1357  | 0.1772  | 0.2689  | 0.1117   | 0.2743    | 0.4083           |
| <b>pil</b>              | NA         | NA        | NA        | NA     | NA     | NA     | NA     | NA      | invalid | invalid | invalid | invalid | invalid  | invalid   | invalid          |
| <b>ace</b>              | NA         | NA        | NA        | NA     | NA     | NA     | NA     | NA      | NA      | invalid | invalid | invalid | invalid  | invalid   | invalid          |
| <b>fsrB</b>             | NA         | NA        | NA        | NA     | NA     | NA     | NA     | NA      | NA      | NA      | 0.0001  | 9E-05   | 4E-11    | 6E-08     | 0.2954           |
| <b>fsrC</b>             | NA         | NA        | NA        | NA     | NA     | NA     | NA     | NA      | NA      | NA      | NA      | 0.0005  | 4E-06    | 0.0017    | 0.6987           |
| <b>fsrA</b>             | NA         | NA        | NA        | NA     | NA     | NA     | NA     | NA      | NA      | NA      | NA      | NA      | 3E-07    | 6E-14     | 0.6297           |
| <b>fsrA &amp; B</b>     | NA         | NA        | NA        | NA     | NA     | NA     | NA     | NA      | NA      | NA      | NA      | NA      | NA       | 2E-06     | 0.2429           |
| <b>fsrA or B</b>        | NA         | NA        | NA        | NA     | NA     | NA     | NA     | NA      | NA      | NA      | NA      | NA      | NA       | NA        | 0.7231           |
| <b>Biofilm Strength</b> | NA         | NA        | NA        | NA     | NA     | NA     | NA     | NA      | NA      | NA      | NA      | NA      | NA       | NA        | NA               |

Key: *p*-value <0.005 <0.01 <0.05
